# Supplementary material
Source: PubMed Central journal article supplement (PMC6556426)
Supplement: NIHMS1520991-supplement-1.pdf [file NIHMS1520991-supplement-1.pdf]

**Supplementary Table 1.** Cross-sectional associations of DNA methylation age in mid-childhood with total serum IgE, atopic sensitization, environmental allergen sensitization, food allergen sensitization and asthma at mid-childhood, additionally adjusting for chronological age at mid-childhood.

| <b>Mid-childhood outcomes</b>        | <b>Mid-childhood DNA methylation age (additionally adjusted for chronological age at mid-childhood)</b> |                |
|--------------------------------------|---------------------------------------------------------------------------------------------------------|----------------|
|                                      | <b>Estimate (95% CI)</b>                                                                                | <b>P value</b> |
| Total serum IgE (log-scale)          | 0.11 (0.02; 0.21)                                                                                       | 0.019          |
|                                      | <b>Odds ratio (95% CI)</b>                                                                              | <b>P value</b> |
| Atopic sensitization                 | 1.21 (1.06; 1.39)                                                                                       | 0.005          |
| Environmental allergen sensitization | 1.17 (1.02; 1.34)                                                                                       | 0.022          |
| Food allergen sensitization          | 1.28 (1.11; 1.49)                                                                                       | 0.001          |
| Current asthma                       | 1.17 (0.99; 1.38)                                                                                       | 0.065          |

Model adjusted for maternal [age at enrollment (continuous), smoking status (never, former, or during pregnancy), education (college / graduate level or not college / graduate level), and atopy history (asthma, eczema or hay fever)], and for child [sex (female or male), race / ethnicity (white, black or others), gestational age (continuous), age at blood draw at mid-childhood (continuous)], and cell type proxies estimated for peripheral blood (percentages of monocytes, granulocytes, CD8T cells, CD4T cells, and B cells).

**Supplementary Table 2.** Summary statistics and correlation matrix between DNA methylation age, intrinsic epigenetic age acceleration and extrinsic epigenetic age acceleration measured at mid-childhood (N=408).

| Mid-childhood       | Summary statistics |              | Spearman correlations |                  |                  |
|---------------------|--------------------|--------------|-----------------------|------------------|------------------|
|                     | Mean (SD)          | Median (IQR) | DNA methylation age   | IEAA (intrinsic) | EEAA (extrinsic) |
| DNA methylation age | 8.8 (1.8)          | 8.5 (2.5)    | 1                     | 0.85             | 0.24             |
| IEAA (intrinsic)    | -0.06 (1.6)        | -0.3 (2.2)   | --                    | 1                | 0.13             |
| EEAA (extrinsic)    | -0.10 (5.8)        | 0.2 (8.2)    | --                    | --               | 1                |

**Supplementary Table 3.** Associations of DNA methylation age, methylation age for gestational age and age acceleration at birth with total serum IgE, atopic sensitization, environmental allergen sensitization, and food allergen sensitization in mid-childhood.

|                                      | “Epigenetic clock” metrics at birth |         |                     |         |                     |         |                     |         |
|--------------------------------------|-------------------------------------|---------|---------------------|---------|---------------------|---------|---------------------|---------|
|                                      | DNA methylation age                 |         | DNAm GA             |         | IEAA (intrinsic)    |         | EEAA (extrinsic)    |         |
|                                      | Estimate (95% CI)                   | P value | Estimate (95% CI)   | P value | Estimate (95% CI)   | P value | Estimate (95% CI)   | P value |
| Total serum IgE (log-scale)          | -0.52 (-1.59; 0.54)                 | 0.335   | 0.03 (-0.123; 0.19) | 0.692   | -0.10 (-1.16; 0.97) | 0.856   | -0.02 (-0.07; 0.02) | 0.295   |
|                                      | Odds ratio (95% CI)                 | P value | Odds ratio (95% CI) | P value | Odds ratio (95% CI) | P value | Odds ratio (95% CI) | P value |
| Atopic sensitization                 | 0.37 (0.08; 1.55)                   | 0.177   | 1.13 (0.91; 1.39)   | 0.271   | 0.43 (0.10; 1.76)   | 0.243   | 0.96 (0.91; 1.02)   | 0.167   |
| Environmental allergen sensitization | 0.40 (0.09; 1.71)                   | 0.223   | 1.20 (0.97; 1.49)   | 0.102   | 0.49 (0.11; 2.02)   | 0.325   | 0.97 (0.91; 1.02)   | 0.252   |
| Food allergen sensitization          | 0.87 (0.15; 4.72)                   | 0.869   | 1.01 (0.79; 1.29)   | 0.946   | 1.12 (0.21; 5.81)   | 0.890   | 0.95 (0.89; 1.01)   | 0.108   |
| Current asthma                       | 0.55 (0.09; 2.96)                   | 0.494   | 0.88 (0.70; 1.10)   | 0.257   | 0.59 (0.11; 3.00)   | 0.530   | 0.96 (0.90; 1.02)   | 0.212   |

For DNAmAge and DNAm GA, model adjusted for maternal [age at enrollment (continuous), smoking status (never, former, or during pregnancy), education (college / graduate level or not college / graduate level), and atopy history (asthma, eczema or hay fever)], child [sex (female or male), race / ethnicity (white, black or others), gestational age (continuous)], and cell type proxies estimated for cord blood (percentages of monocytes, granulocytes, CD8T cells, CD4T cells, B cells and nucleated red blood cells).

For IEAA and EEAA, models adjusted for maternal [age at enrollment (continuous), smoking status (never, former, or during pregnancy), education (college / graduate level or not college / graduate level), atopy history (asthma, eczema or hay fever)], child [sex (female or male), race / ethnicity (white, black or others), gestational age (continuous)].

**Supplementary Table 4.** Associations of DNA methylation age and age acceleration at early-childhood with total serum IgE, atopic sensitization, environmental allergen sensitization, and food allergen sensitization in mid-childhood.

| Mid-childhood outcomes               | “Epigenetic clock” metrics at early-childhood |         |                     |         |                     |         |
|--------------------------------------|-----------------------------------------------|---------|---------------------|---------|---------------------|---------|
|                                      | DNA methylation age                           |         | IEAA (intrinsic)    |         | EEAA (extrinsic)    |         |
|                                      | Estimate (95% CI)                             | P value | Estimate (95% CI)   | P value | Estimate (95% CI)   | P value |
| Total serum IgE (log-scale)          | 0.16 (-0.38; 0.70)                            | 0.573   | 0.23 (-0.38; 0.84)  | 0.461   | 0.003 (-0.08; 0.08) | 0.949   |
|                                      | Odds ratio (95% CI)                           | P value | Odds ratio (95% CI) | P value | Odds ratio (95% CI) | P value |
| Atopic sensitization                 | 1.89 (0.83; 4.77)                             | 0.145   | 1.71 (0.71; 4.42)   | 0.241   | 0.99 (0.88; 1.11)   | 0.836   |
| Environmental allergen sensitization | 1.48 (0.66; 3.62)                             | 0.362   | 1.87 (0.77; 4.98)   | 0.182   | 0.97 (0.86; 1.09)   | 0.625   |
| Food allergen sensitization          | 3.40 (0.85; 18.36)                            | 0.108   | 2.17 (0.62; 10.10)  | 0.267   | 0.97 (0.83; 1.13)   | 0.706   |
| Current asthma                       | 0.64 (0.25; 1.52)                             | 0.332   | 0.80 (0.32; 1.96)   | 0.617   | 1.00 (0.87; 1.14)   | 0.970   |

For DNAmAge, models adjusted for maternal [age at enrollment (continuous), smoking status (never, former, or during pregnancy), education (college / graduate level or not college / graduate level), and atopy history (asthma, eczema or hay fever)], child [sex (female or male), race / ethnicity (white, black or others), gestational age (continuous)], and cell type proxies estimated for peripheral blood (percentages of monocytes, granulocytes, CD8T cells, CD4T cells, and B cells).

For IEAA and EEAA, models adjusted for maternal [age at enrollment (continuous), smoking status (never, former, or during pregnancy), education (college / graduate level or not college / graduate level), and atopy history (asthma, eczema or hay fever)], child [sex (female or male), race / ethnicity (white, black or others), gestational age (continuous)].

**Supplementary Table 5.** Associations of chronological age at early and mid-childhood with total serum IgE, atopic sensitization, environmental allergen sensitization, and food allergen sensitization in mid-childhood.

| <b>Mid-childhood outcomes</b>        | <b>Chronological age at early-childhood</b> |                | <b>Chronological age at mid-childhood</b> |                |
|--------------------------------------|---------------------------------------------|----------------|-------------------------------------------|----------------|
|                                      | <b>Estimate (95% CI)</b>                    | <b>P value</b> | <b>Estimate (95% CI)</b>                  | <b>P value</b> |
| Total serum IgE (log-scale)          | 0.41 (-0.42; 1.25)                          | 0.334          | 0.03 (-0.20; 0.26)                        | 0.267          |
|                                      | <b>Odds ratio (95% CI)</b>                  | <b>P value</b> | <b>Odds ratio (95% CI)</b>                | <b>P value</b> |
| Atopic sensitization                 | 3.47 (0.94; 17.7)                           | 0.088          | 1.12 (0.82; 1.55)                         | 0.463          |
| Environmental allergen sensitization | 0.93 (0.24; 3.23)                           | 0.914          | 1.32 (0.97; 1.81)                         | 0.078          |
| Food allergen sensitization          | 0.82 (0.14; 3.69)                           | 0.809          | 0.81 (0.57; 1.13)                         | 0.222          |
| Current asthma                       | 0.15 (0.009; 1.06)                          | 0.113          | 1.11 (0.80; 1.52)                         | 0.524          |

Model adjusted for maternal [age at enrollment (continuous), smoking status (never, former, or during pregnancy), education (college / graduate level or not college / graduate level), and atopy history (asthma, eczema or hay fever)], child [sex (female or male), race / ethnicity (white, black or others), gestational age (continuous)].

**Supplementary Table 6.** Participant characteristics in the ‘Genetics of Asthma in Costa Rica’ cohort.

| <b>Participant characteristics</b>               | <b>N=159</b>   |
|--------------------------------------------------|----------------|
| <b>Maternal</b>                                  |                |
| Current smoking status, N (%)                    |                |
| Yes                                              | 7 (4%)         |
| No                                               | 152 (96%)      |
| Asthma history, N (%)*                           |                |
| Yes                                              | 45 (28%)       |
| No                                               | 113 (71%)      |
| <b>Child</b>                                     |                |
| Age (years), mean (SD)                           | 9.1 (1.8)      |
| Sex, N (%)                                       |                |
| Female                                           | 64 (41%)       |
| Male                                             | 95 (59%)       |
| Total serum IgE (kU/L), mean (SD)                | 840.7 (1016.6) |
| Atopic sensitization (skin), N (%)               |                |
| Yes                                              | 144 (91%)      |
| No                                               | 15 (9%)        |
| Atopic sensitization (blood), N (%) <sup>*</sup> |                |
| Yes                                              | 136 (86%)      |
| No                                               | 23 (14%)       |
| Asthma, N (%) <sup>†</sup>                       |                |
| Yes                                              | 98 (62%)       |
| No                                               | 44 (28%)       |

\* number of missing = 1

† number of missing = 17

**Supplementary Table 7.** Replication: associations of DNA methylation age and age acceleration at mid-childhood with total serum IgE and atopic sensitization in mid-childhood in the ‘Genetics of Asthma in Costa Rica’ cohort.

| <b>Mid-childhood outcomes</b> | <b>Costa Rica cohort</b>   |                |                            |                |                            |                |
|-------------------------------|----------------------------|----------------|----------------------------|----------------|----------------------------|----------------|
|                               | <b>DNA methylation age</b> |                | <b>IEAA (intrinsic)</b>    |                | <b>EEAA (extrinsic)</b>    |                |
|                               | <b>Estimate (95% CI)</b>   | <b>P value</b> | <b>Estimate (95% CI)</b>   | <b>P value</b> | <b>Estimate (95% CI)</b>   | <b>P value</b> |
| Total serum IgE (log-scale)   | 0.01 (-0.03; 0.05)         | 0.512          | 0.01 (-0.03; 0.06)         | 0.492          | 0.03 (-0.02; 0.08)         | 0.214          |
|                               | <b>Odds ratio (95% CI)</b> | <b>P value</b> | <b>Odds ratio (95% CI)</b> | <b>P value</b> | <b>Odds ratio (95% CI)</b> | <b>P value</b> |
| Atopic sensitization (skin)   | 1.18 (1.04; 1.38)          | 0.019          | 1.19 (1.05; 1.37)          | 0.010          | 1.18 (1.05; 1.35)          | 0.009          |
| Atopic sensitization (IgE)    | 1.07 (0.98; 1.17)          | 0.165          | 1.07 (0.98; 1.18)          | 0.139          | 1.09 (0.99; 1.21)          | 0.074          |
| Asthma                        | 1.07 (1.00; 1.15)          | 0.066          | 1.09 (1.01; 1.18)          | 0.027          | 1.08 (1.00; 1.17)          | 0.064          |

For DNAmAge, models adjusted for maternal [current smoking status (yes / no), asthma history (yes / no)], child [sex (female or male)], plate and cell type proxies estimated for peripheral blood (percentages of monocytes, granulocytes, CD8T cells, CD4T cells, and B cells).

For IEAA and EEAA, models adjusted for maternal [current smoking status (yes / no), asthma history (yes / no)], child [sex (female or male)] and plate.

Supplementary Figure 1.

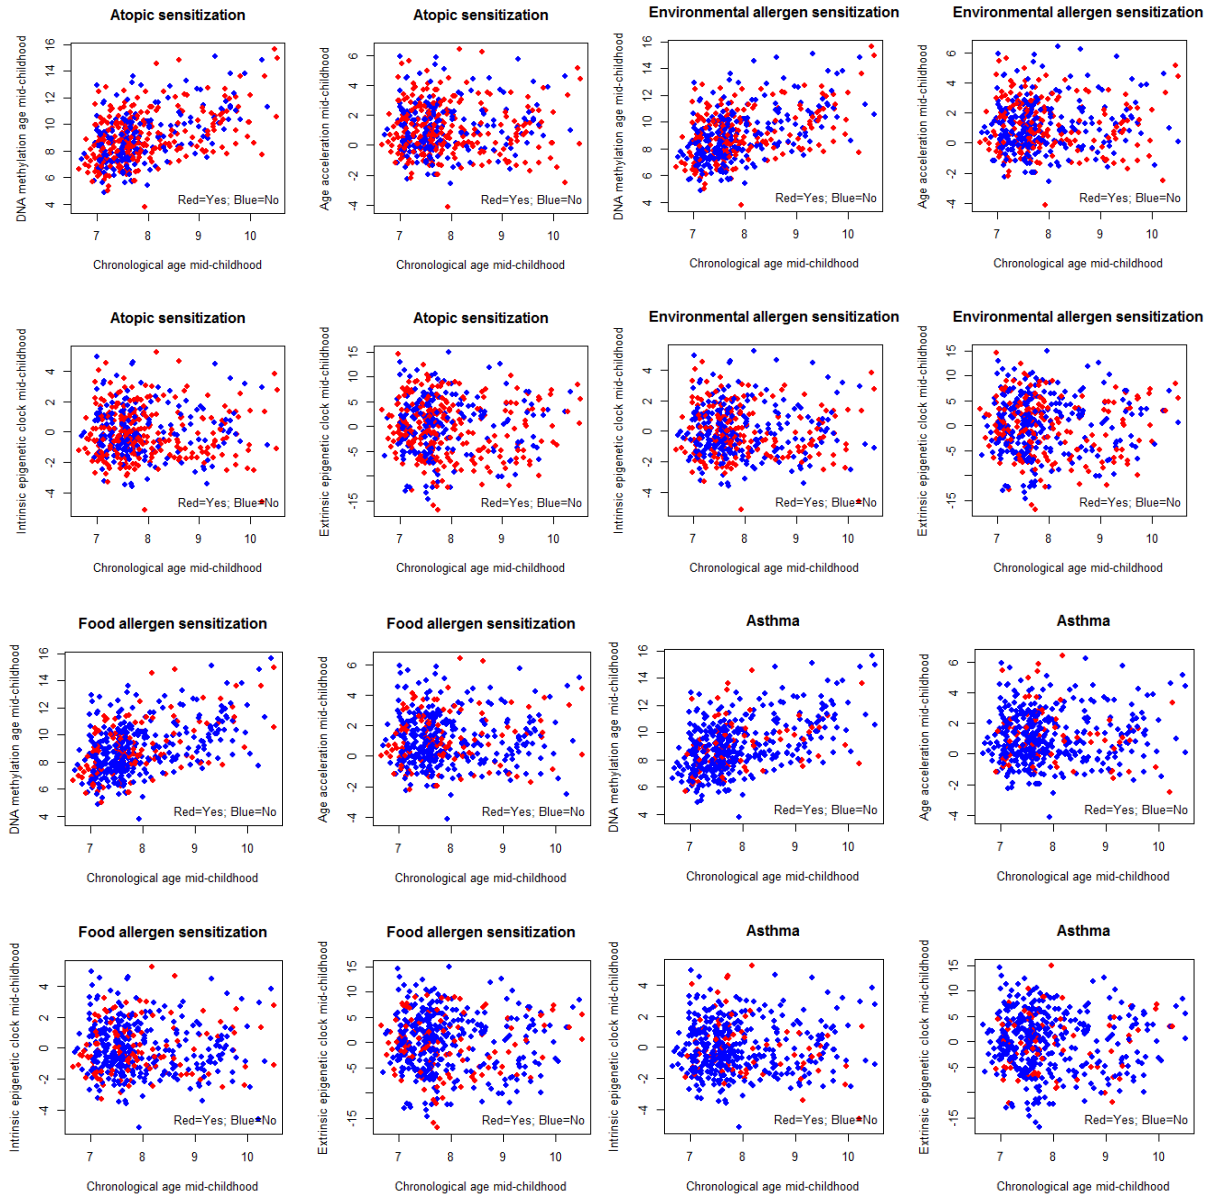



Supplementary Figure 2.

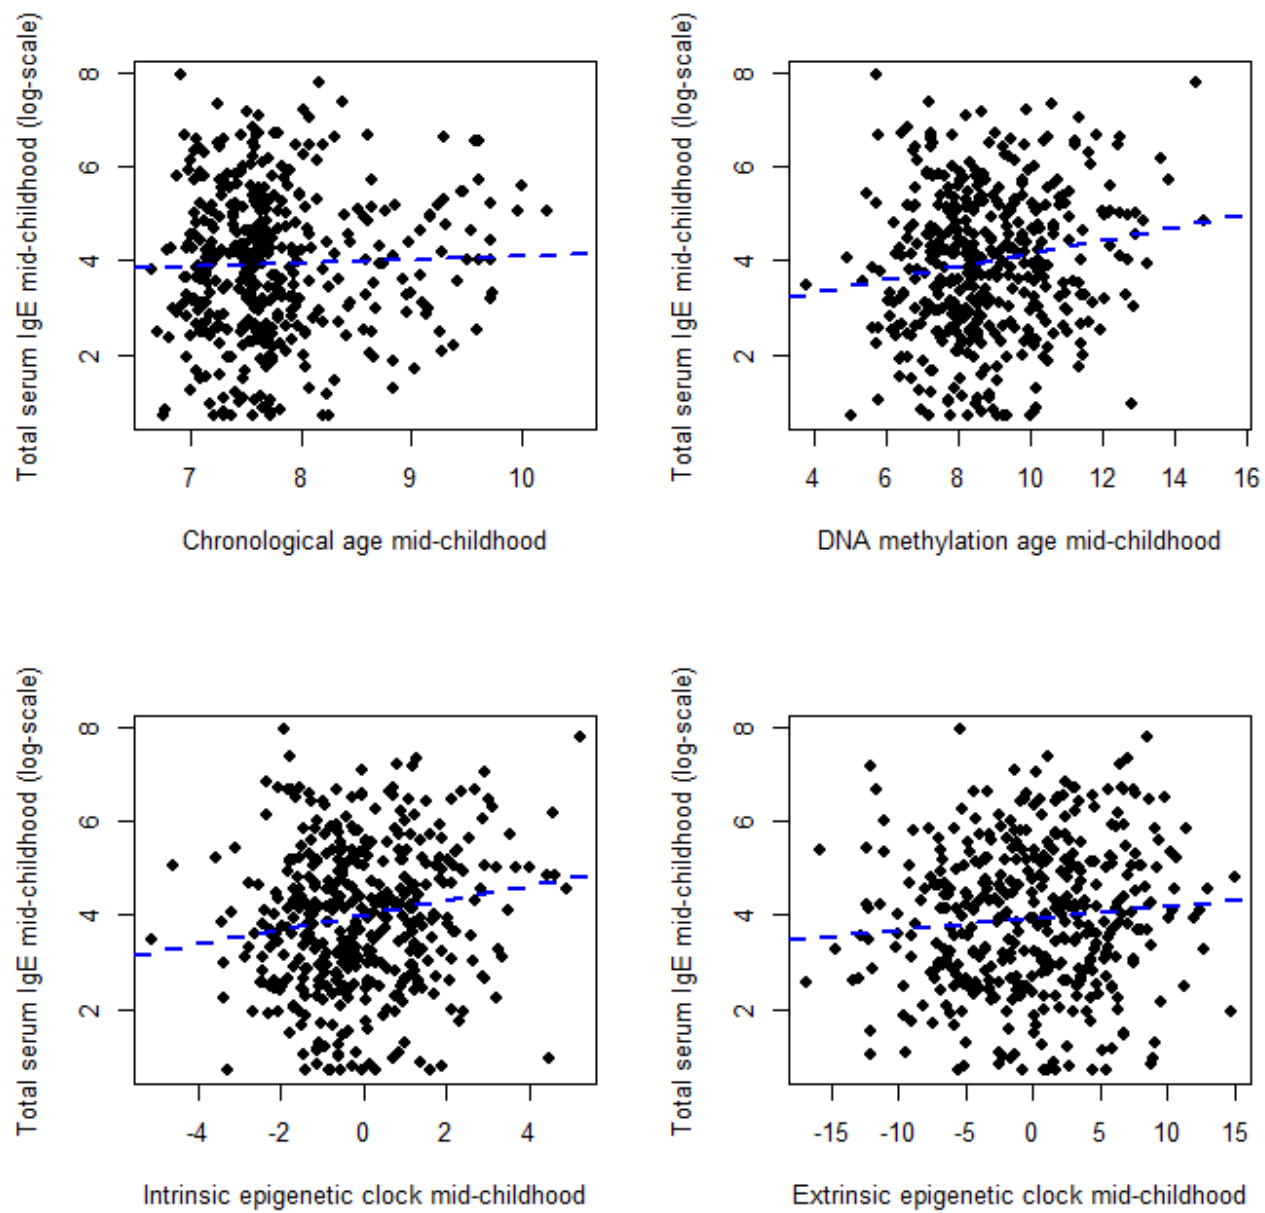

Supplementary Figure 3.

**At birth: all participants**

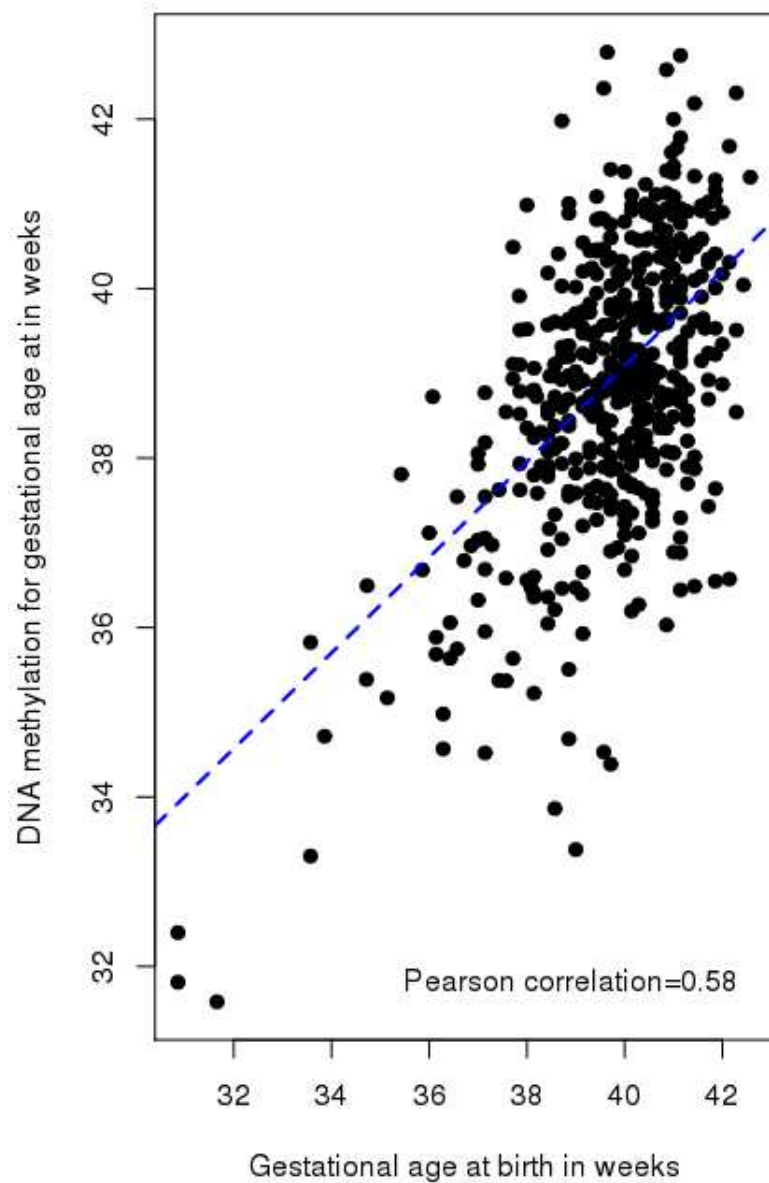

**At birth: participants with allergy measures at mid-childhood**

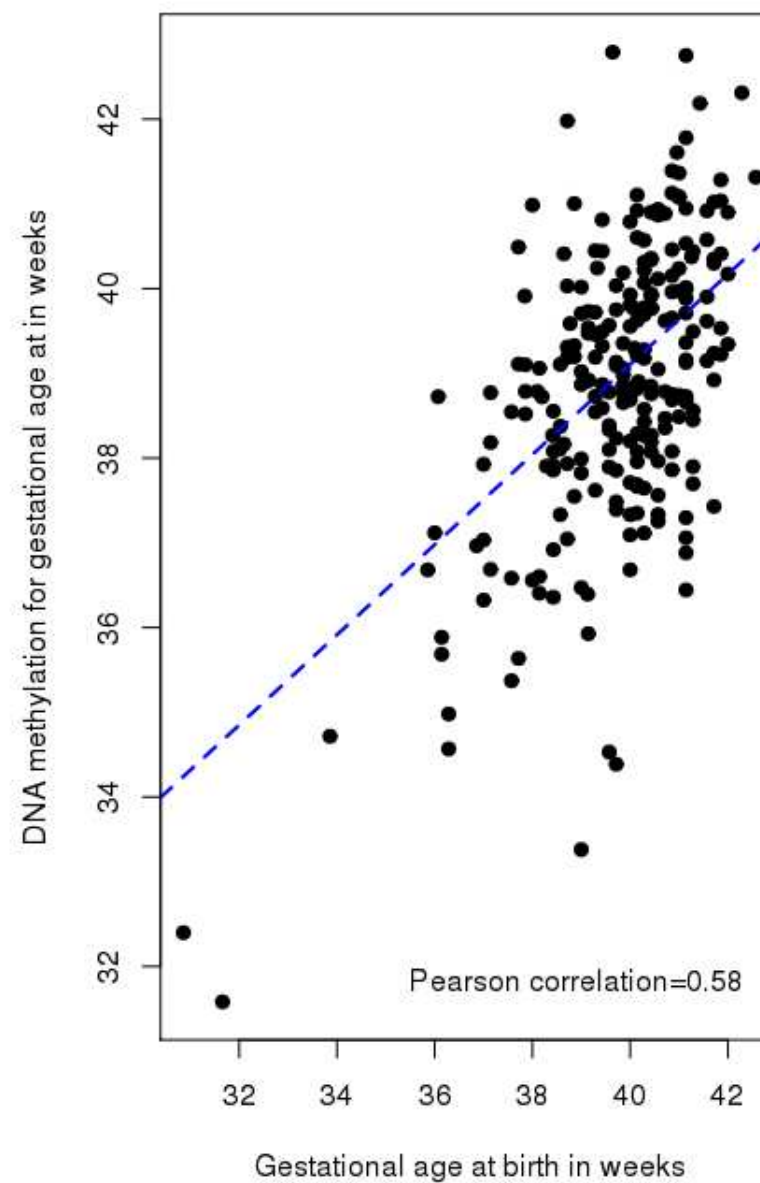

Supplementary Figure 4.

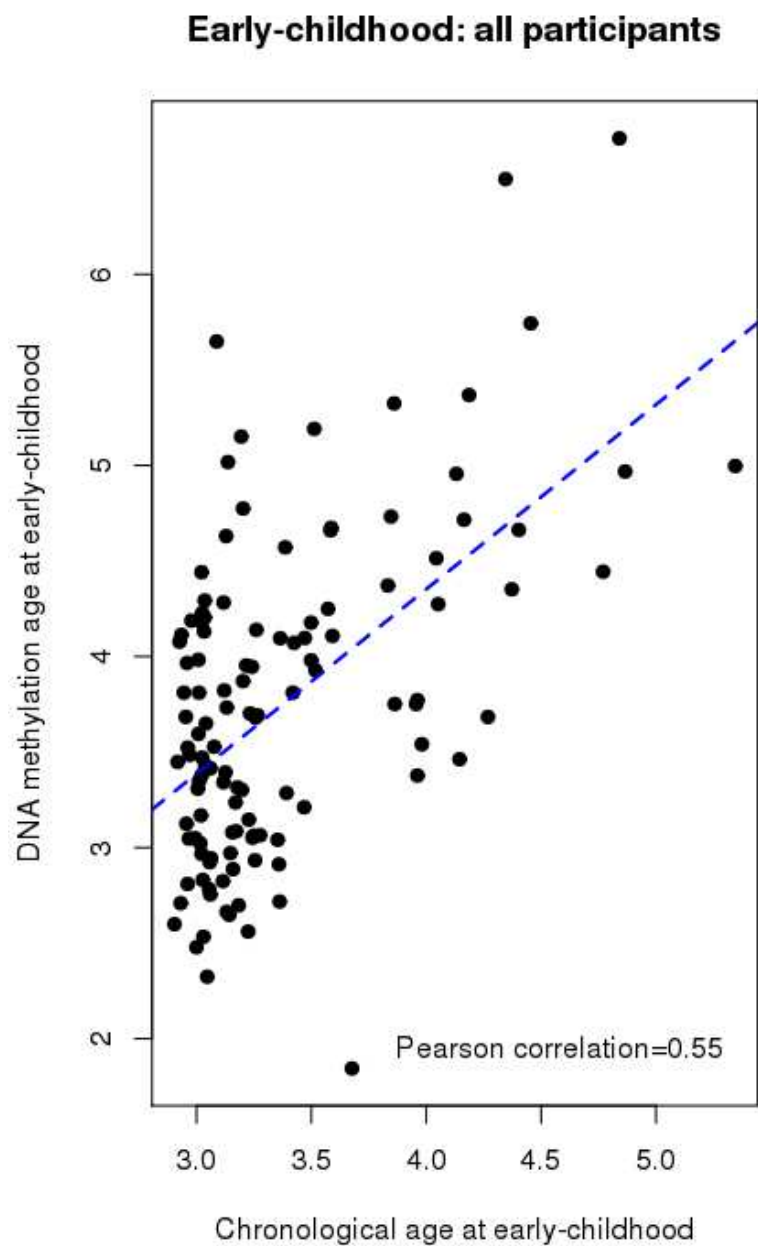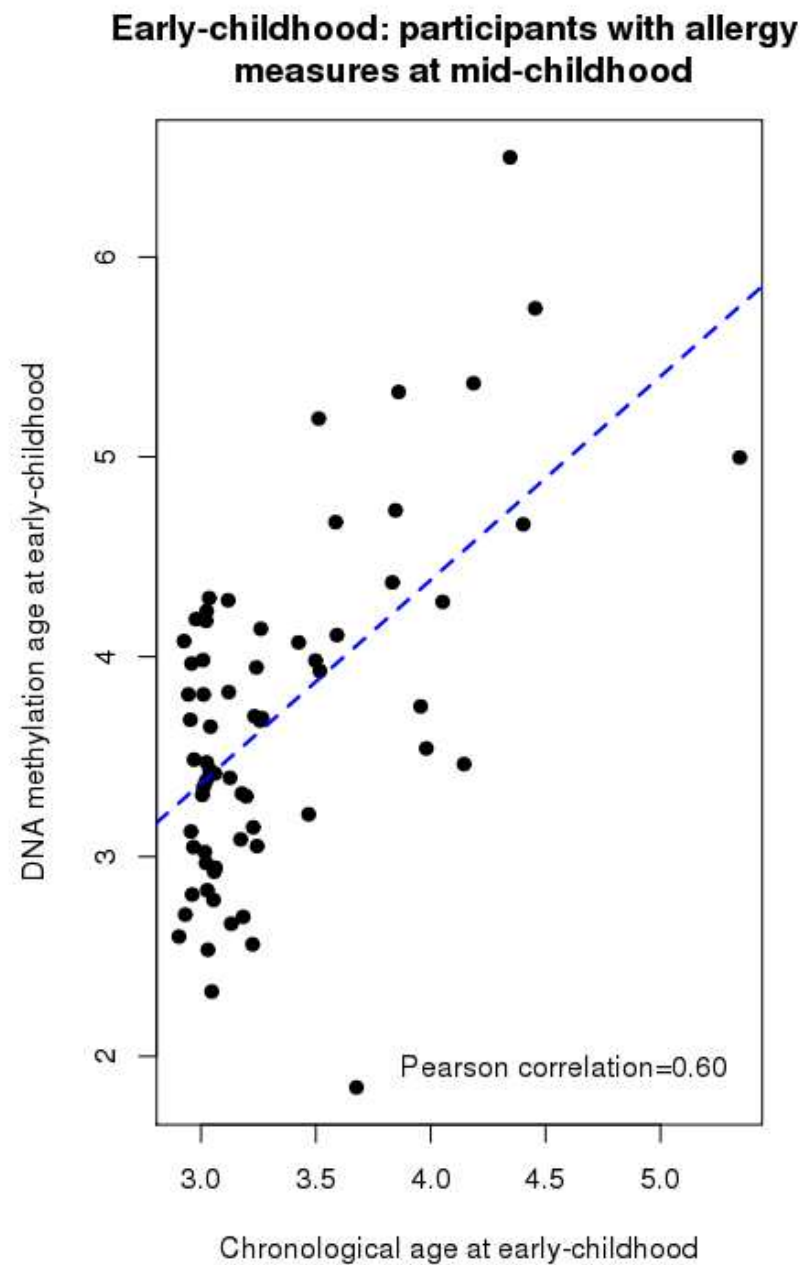

Supplementary Figure 5.

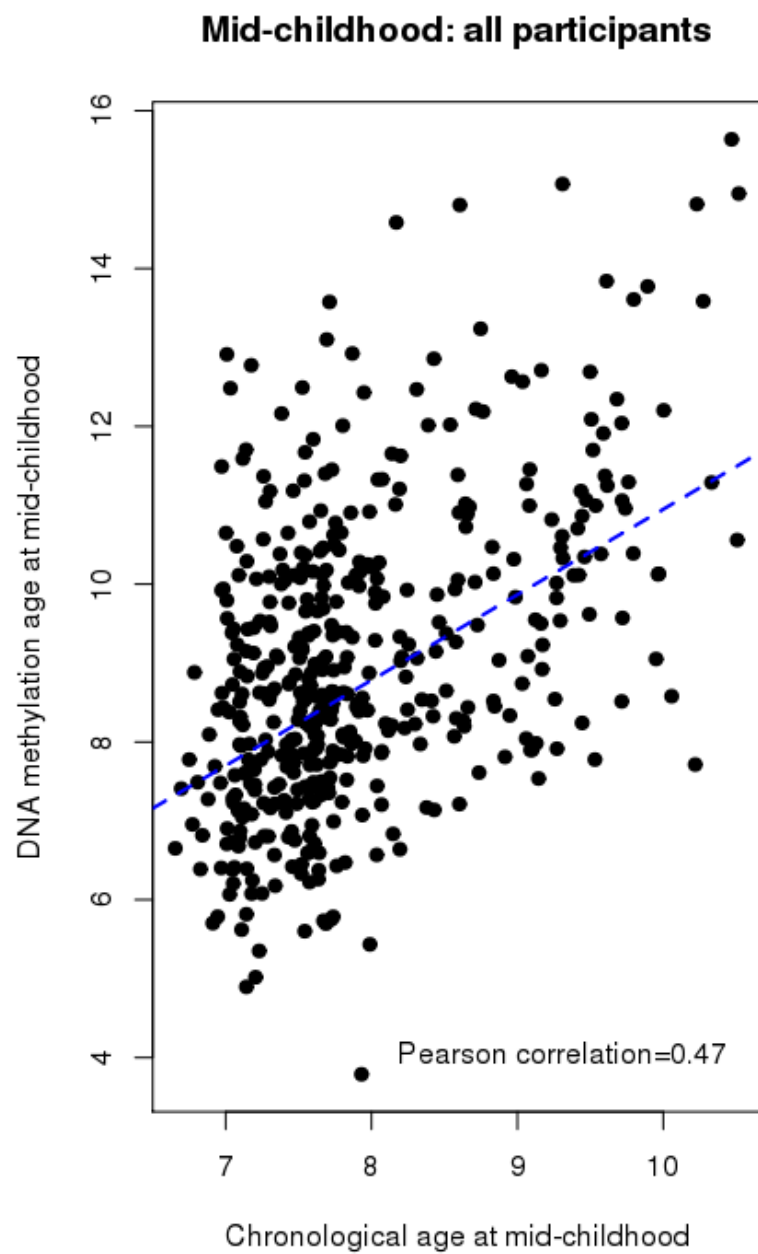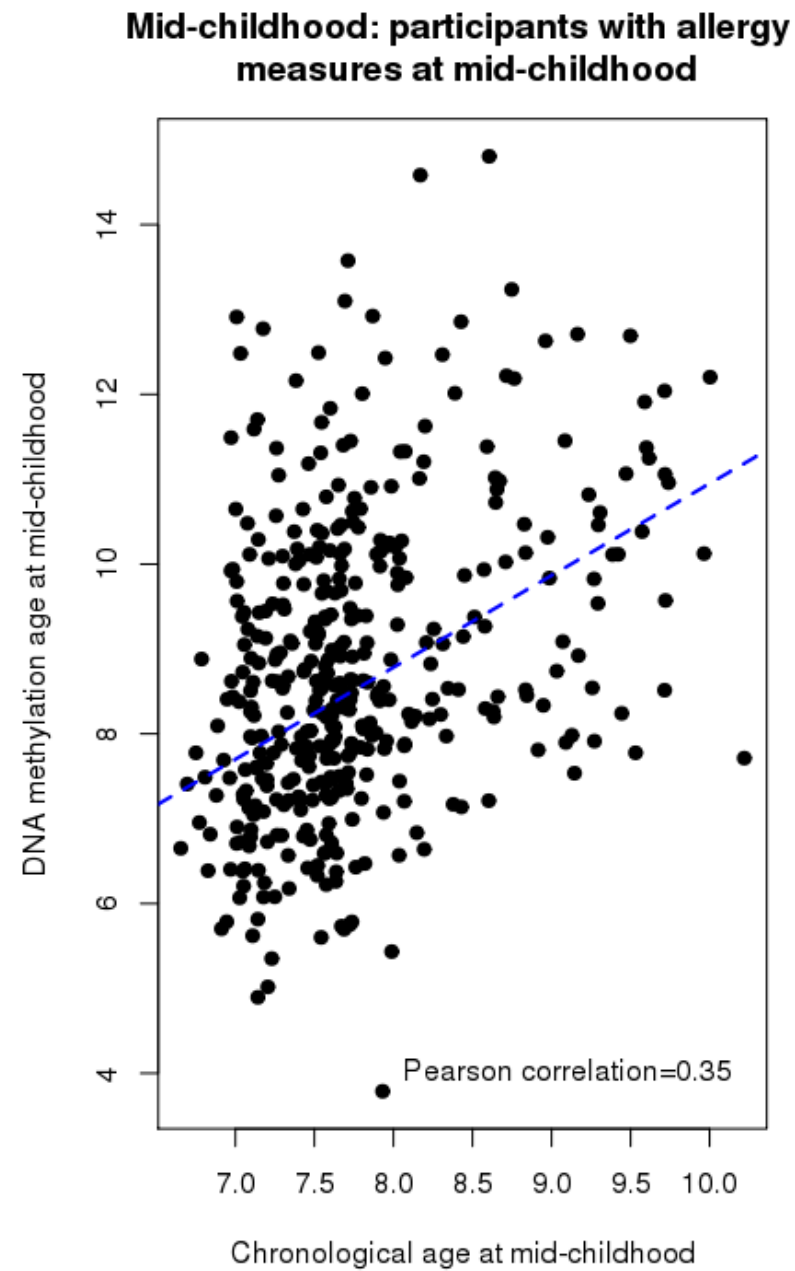

Supplementary Figure 6.

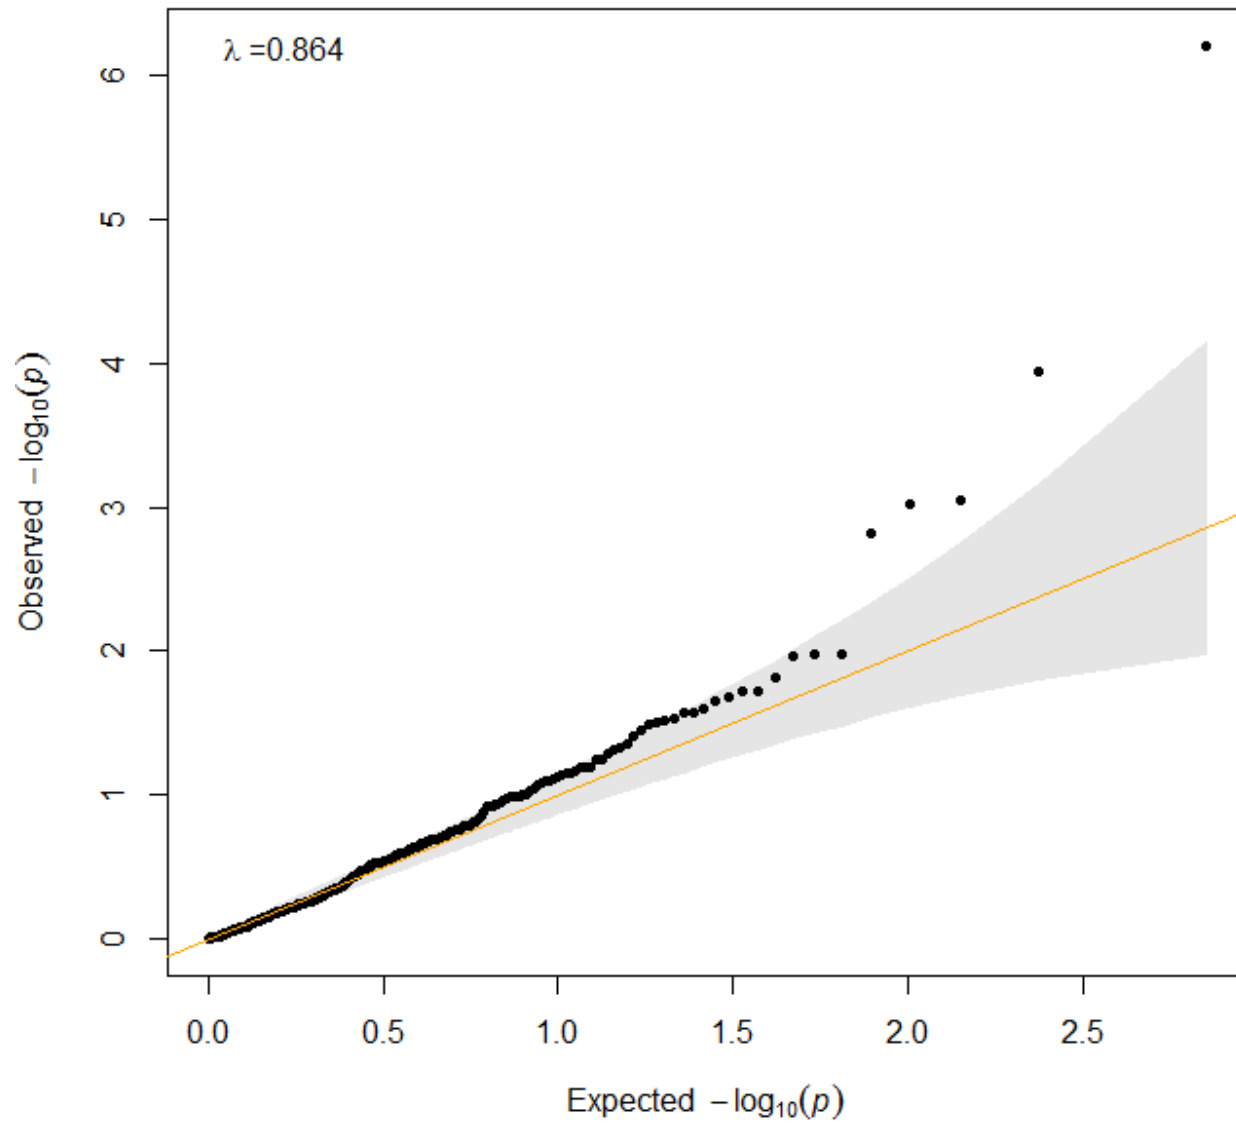

Supplementary Figure 7.

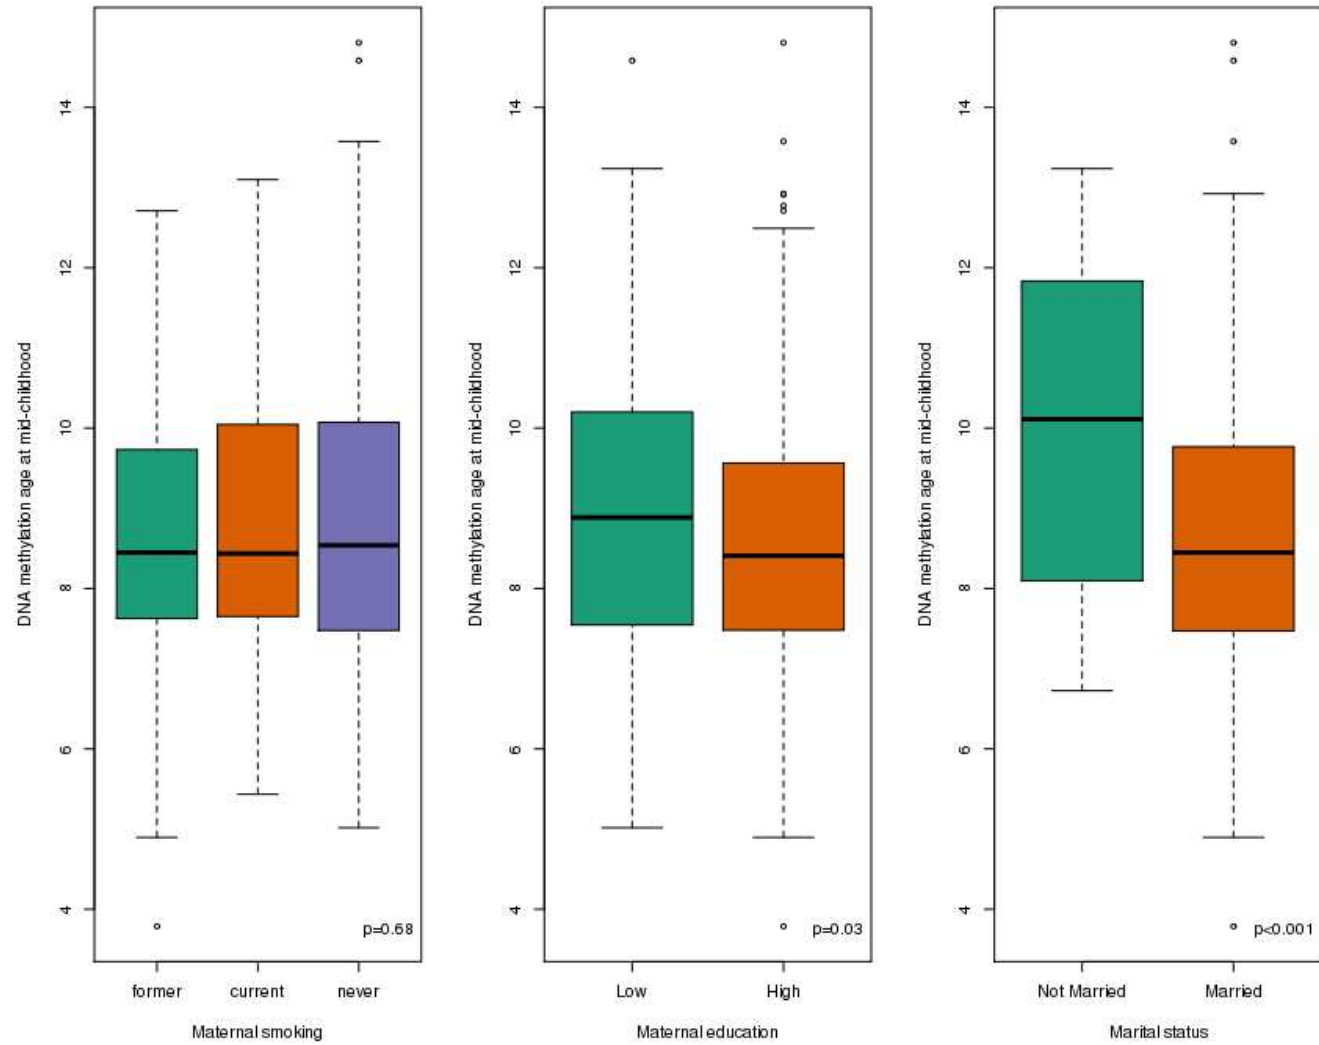

**Supplementary Figure legend:**

**Supplementary Figure 1.**

Scatter plot of chronological age vs. DNA methylation age and age acceleration at mid-childhood by atopic sensitization, environmental allergen sensitization, food allergen sensitization and asthma status (red=yes; blue=no).

**Supplementary Figure 2.**

Scatter plots of DNA methylation age vs. total serum IgE (log-scale) at mid-childhood (Horvath estimate).

**Supplementary Figure 3.**

Scatter plots of gestational week at delivery vs. DNA methylation for gestational age (in week) (Knight estimate).

**Supplementary Figure 4.**

Scatter plots of chronological age vs. DNA methylation age at early-childhood visit (Horvath estimate).

**Supplementary Figure 5.**

Scatter plots of chronological age vs. DNA methylation age at mid-childhood visit (Horvath estimate).

**Supplementary Figure 6.**

Q-Q plot of the association between chronological age and the 353 methylation sites contributing to the Horvath's DNA methylation age.

**Supplementary Figure 7.**

DNA methylation age at mid-childhood by maternal smoking status and sociodemographic characteristics (maternal education level; maternal marital status) measured during pregnancy.
